# Supplementary material for: A comparison of calcium hydroxide/iodoform paste and zinc oxide eugenol as root filling materials for pulpectomy in primary teeth: A systematic review and meta‐analysis
Source: PubMed Central journal article supplement (PMC6585588; doi:10.1002/cre2.173), 2019-03-04

### Clinical success rate at 6 months follow up

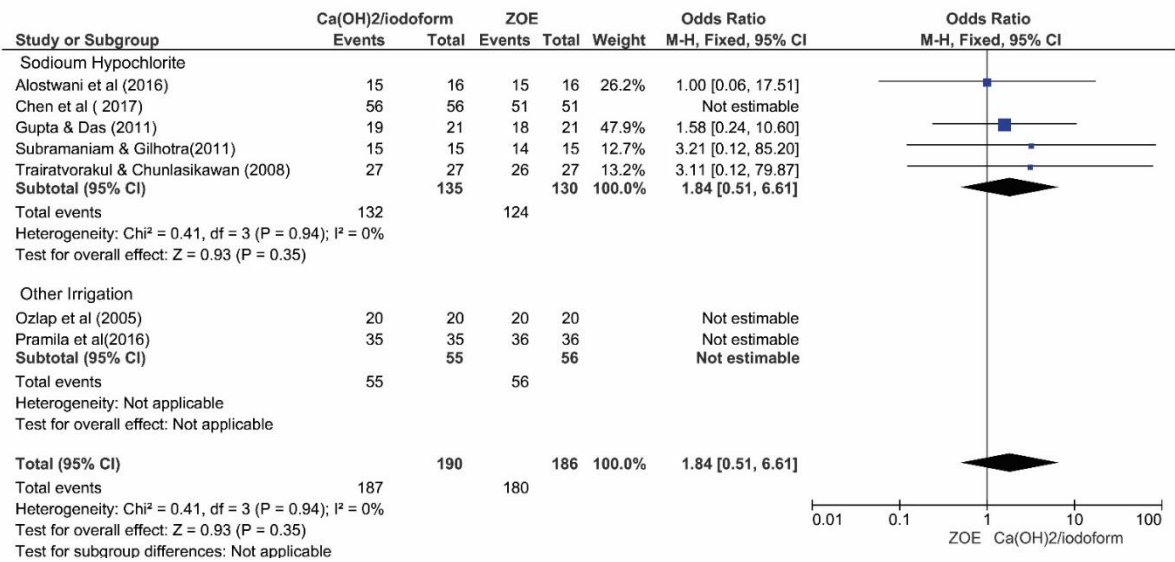

### Radiographic success rate at 6 months follow up

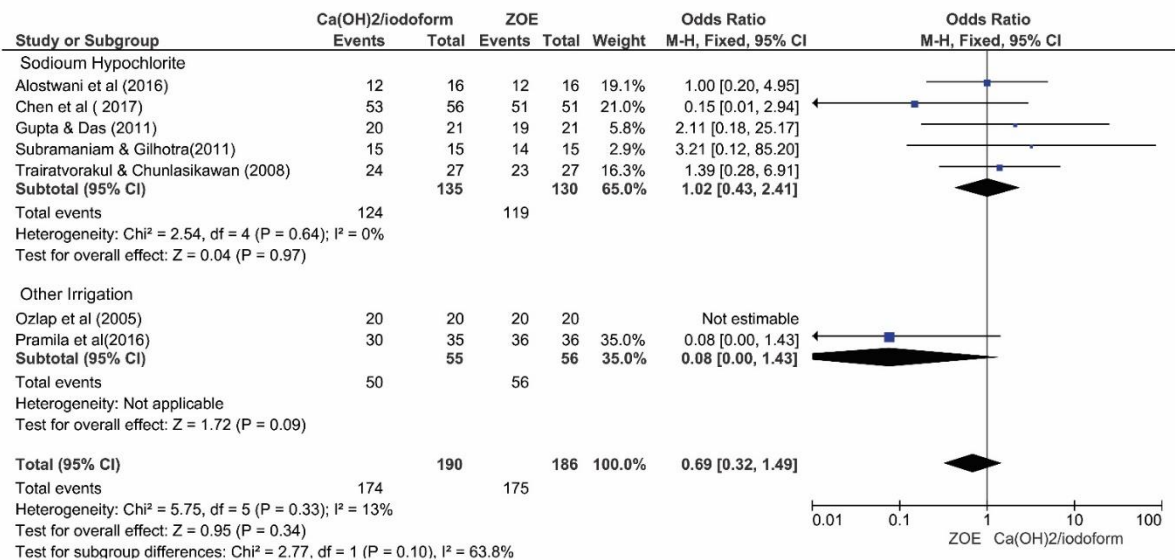

Figure S1. Forest plot for meta-analysis of the clinical and radiographic success rate of Ca(OH)<sub>2</sub>/iodoform compared to ZOE at 6 months follow up according to the type of irrigation

### Clinical success rate at 12 months follow up

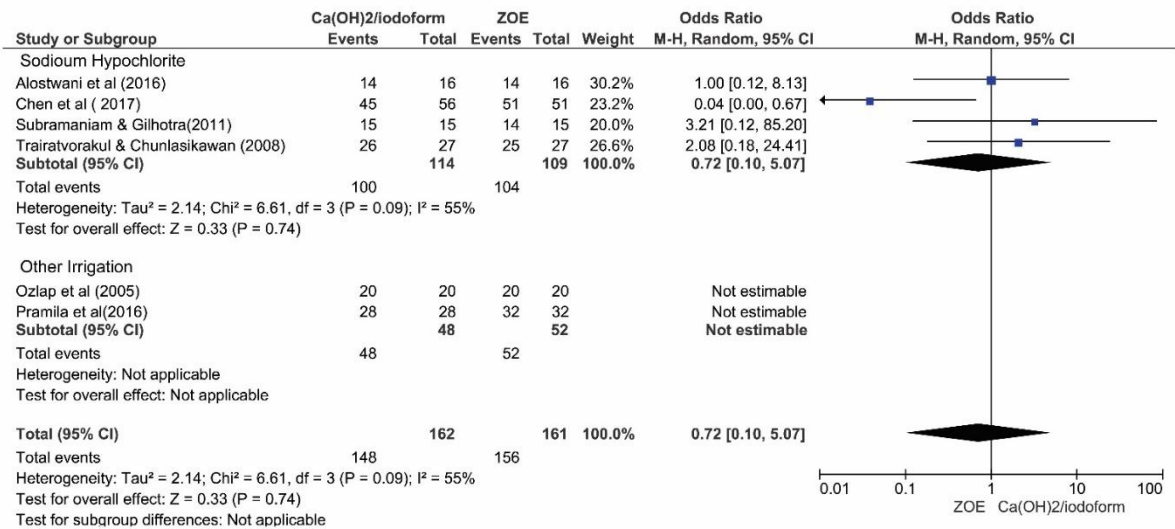

### Radiographic success rate at 12 months follow up

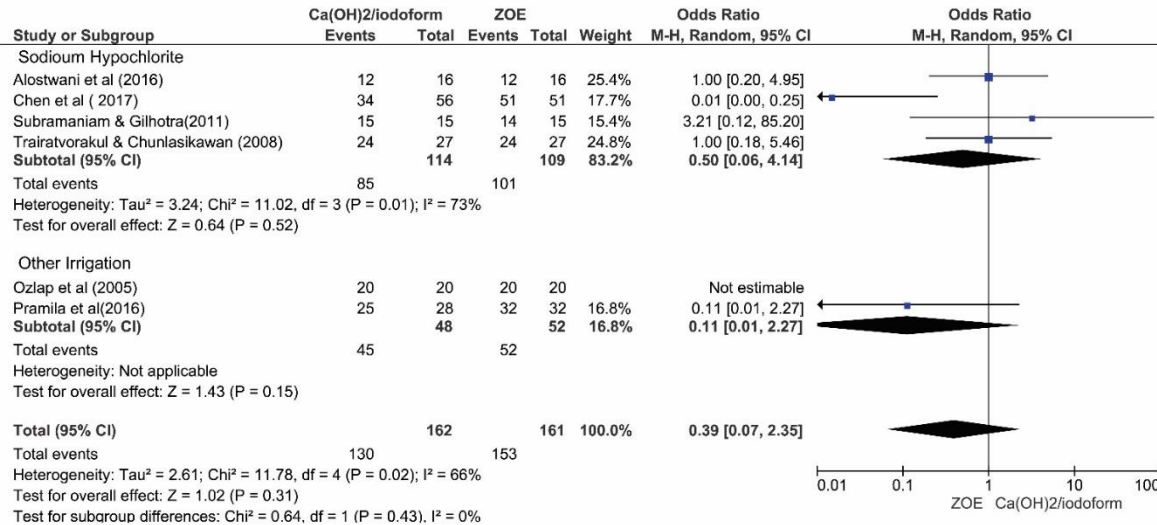

Figure S2. Forest plot for meta-analysis of the clinical and radiographic success rate of Ca(OH)<sub>2</sub>/iodoform compared to ZOE at 12 months follow up according to the type of irrigation

### Clinical success rate at $\geq 18$ months follow up

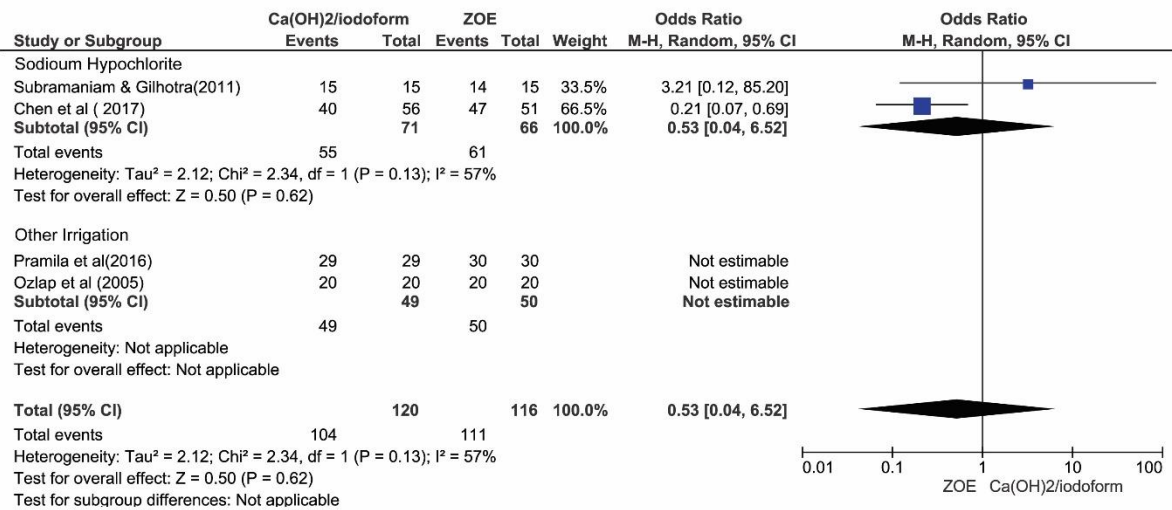

### Radiographic success rate at $\geq 18$ months follow

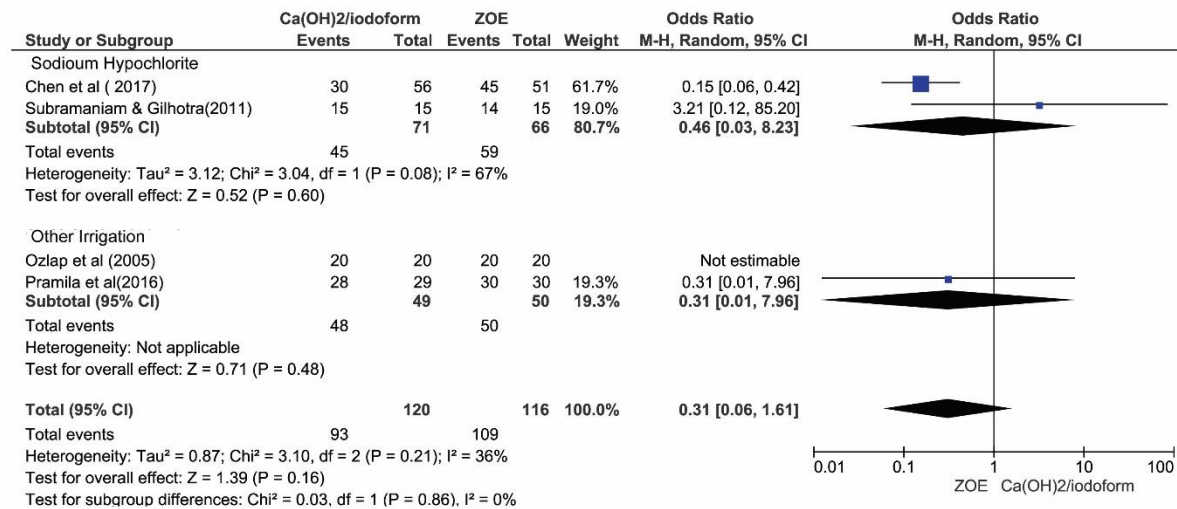

Figure S3. Forest plot for meta-analysis of the clinical and radiographic success rate of Ca(OH)<sub>2</sub>/iodoform compared to ZOE at  $\geq 18$  months follow up according to the type of irrigation

### Clinical success rate at 6 months follow up

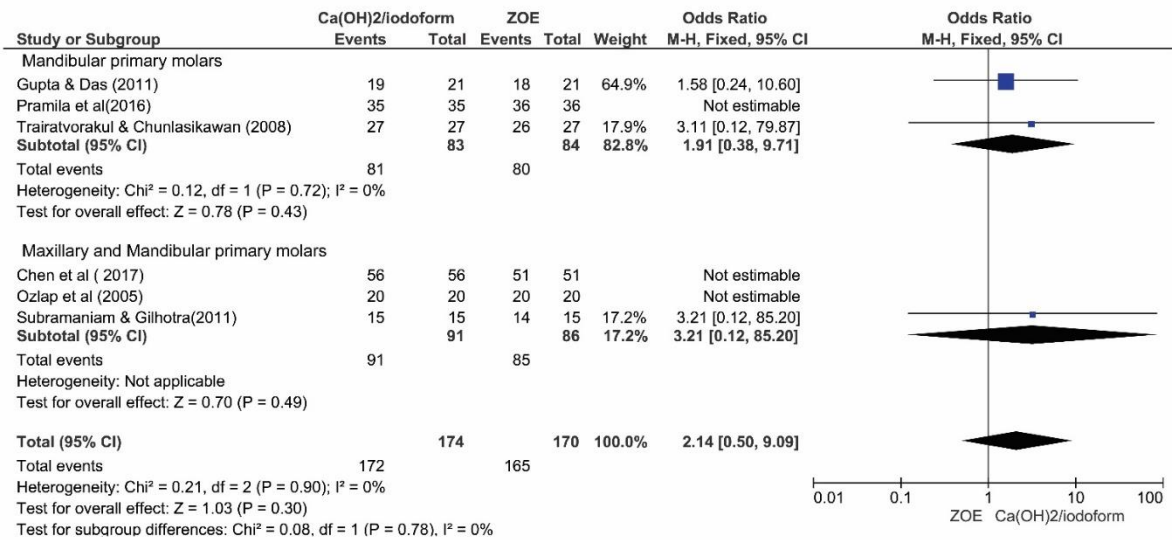

### Radiographic success rate at 6 months follow up

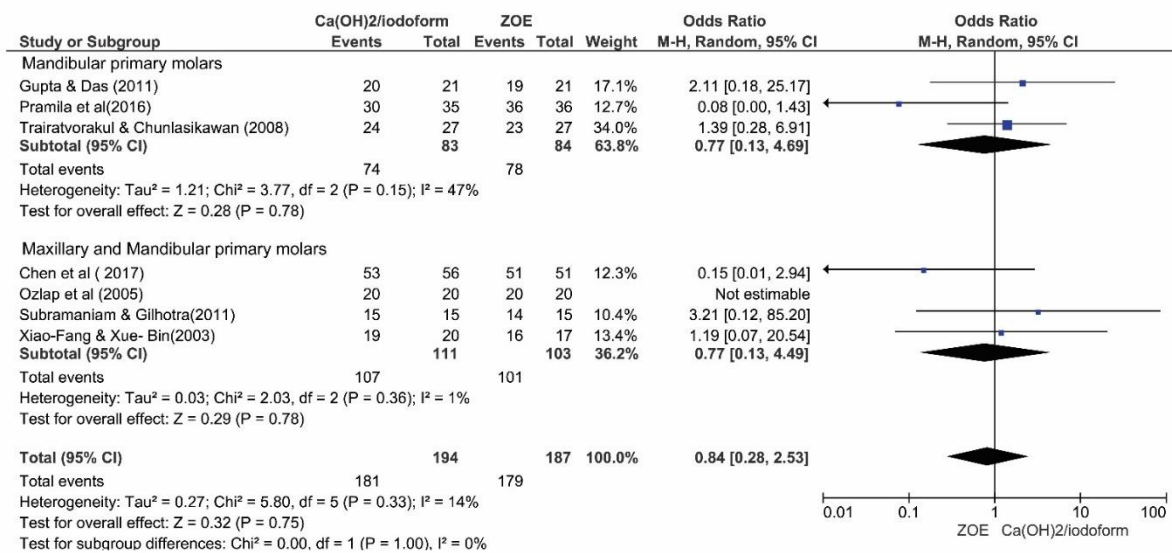

Figure S4. Forest plot for meta-analysis of the clinical success rate of Ca(OH)<sub>2</sub>/iodoform compared to ZOE at 6 months follow up in relation to the type of teeth

### Clinical success rate at 12 months follow up

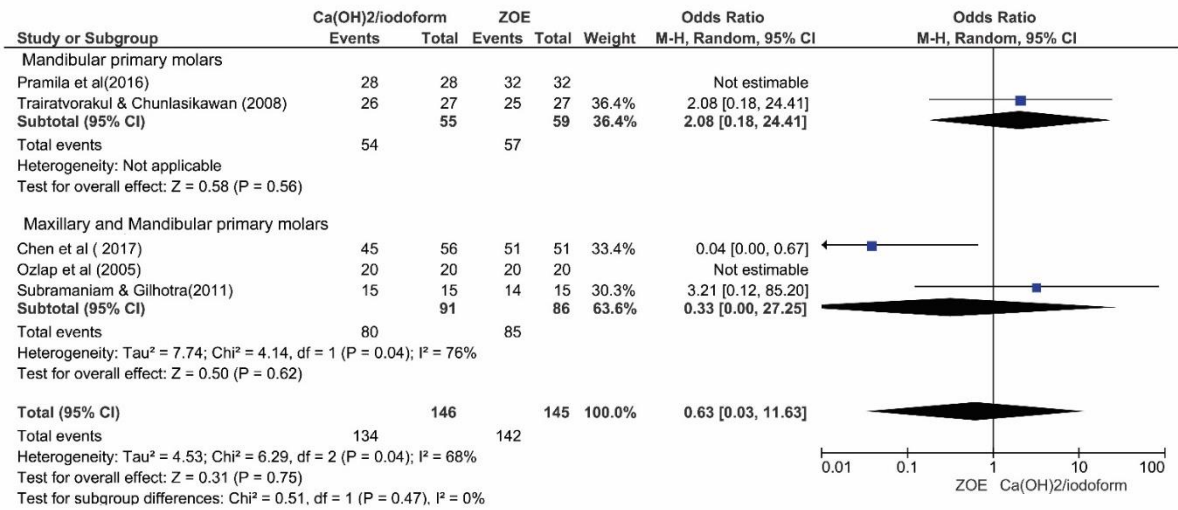

### Radiographic success rate at 12 months follow up

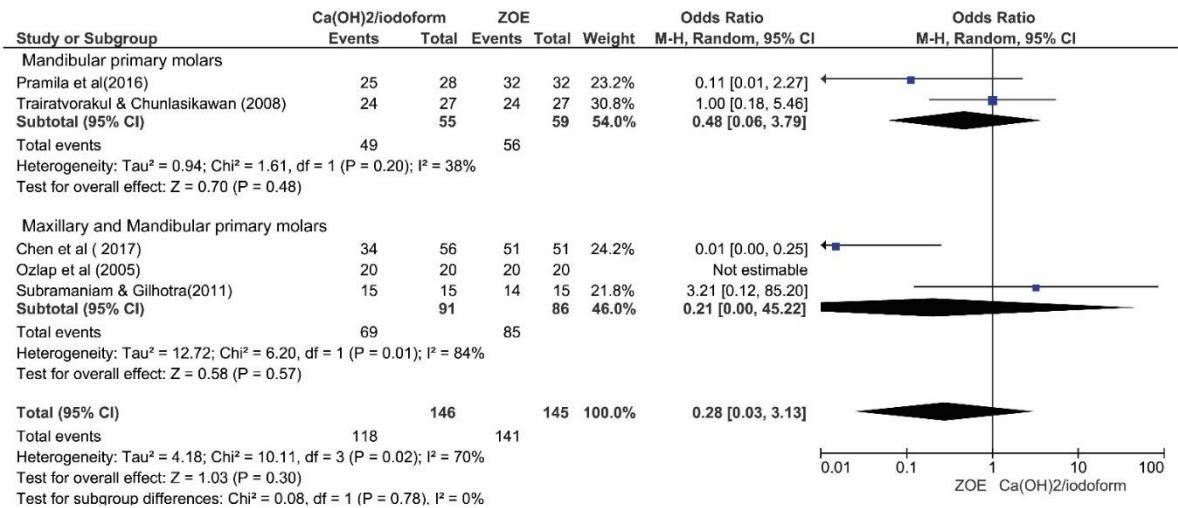

Figure S5. Forest plot for meta-analysis of the clinical success rate of Ca(OH)<sub>2</sub>/iodoform compared to ZOE at 12 months follow up in relation to the type of teeth

Clinical success rate at ≥18 months follow up

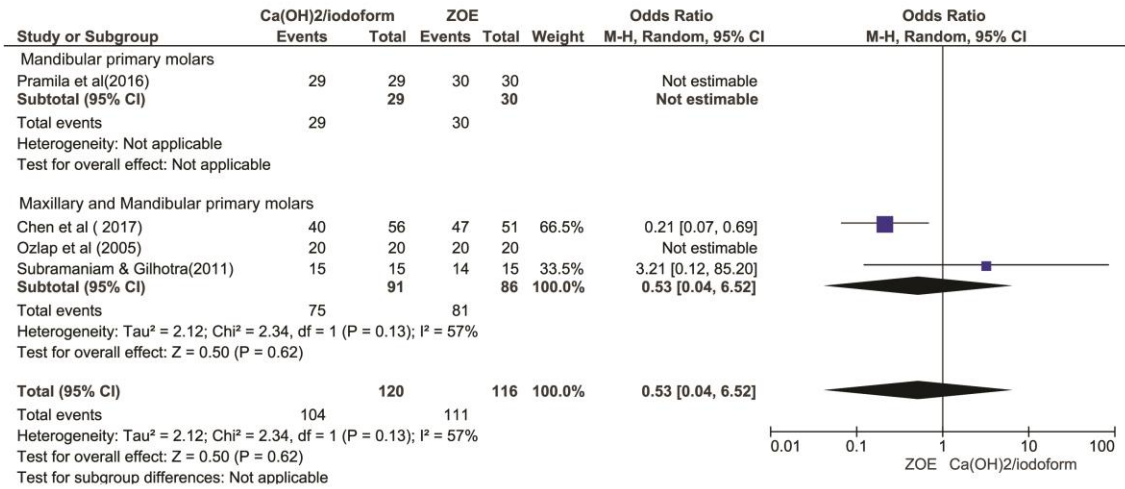

Radiographic success rate at ≥18 months follow up

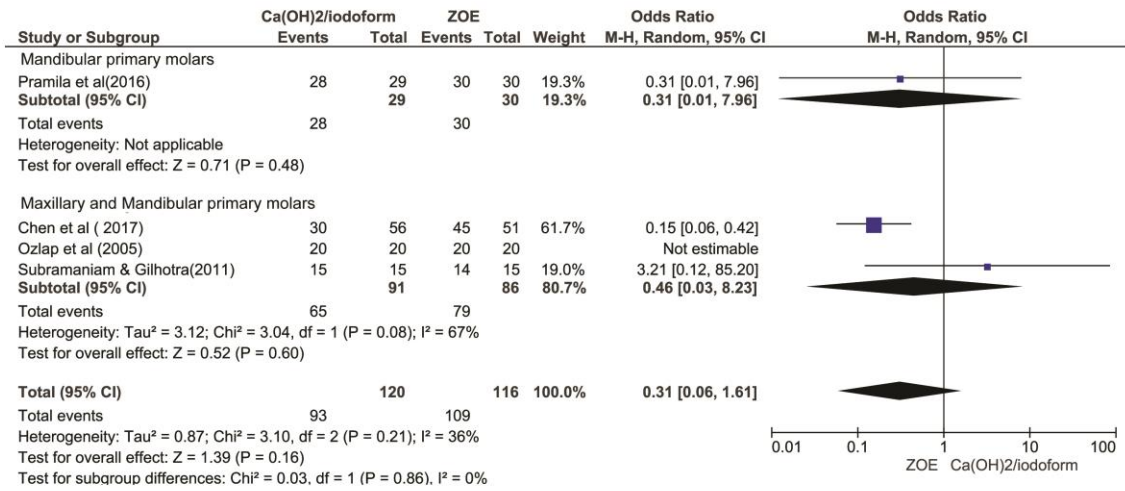

Figure S6. Forest plot for meta-analysis of the clinical success rate of Ca(OH)<sub>2</sub>/iodoform compared to ZOE at ≥18 months follow up in relation to the type of teeth

Clinical success rate at 6 months follow up

(1) ZOE:

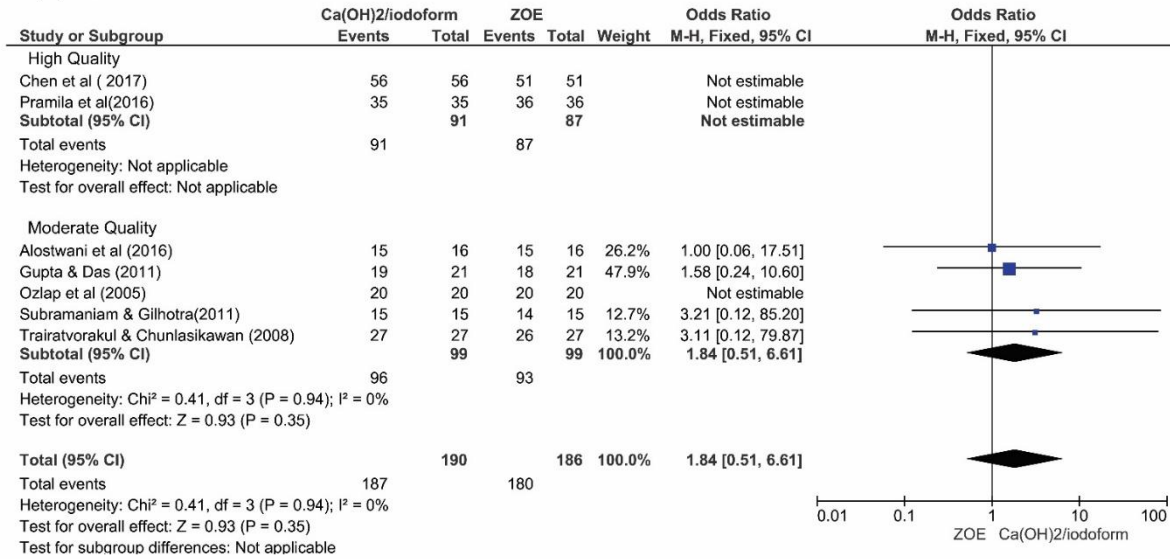

(2) ZOE /iodoform + Ca(OH)<sub>2</sub>

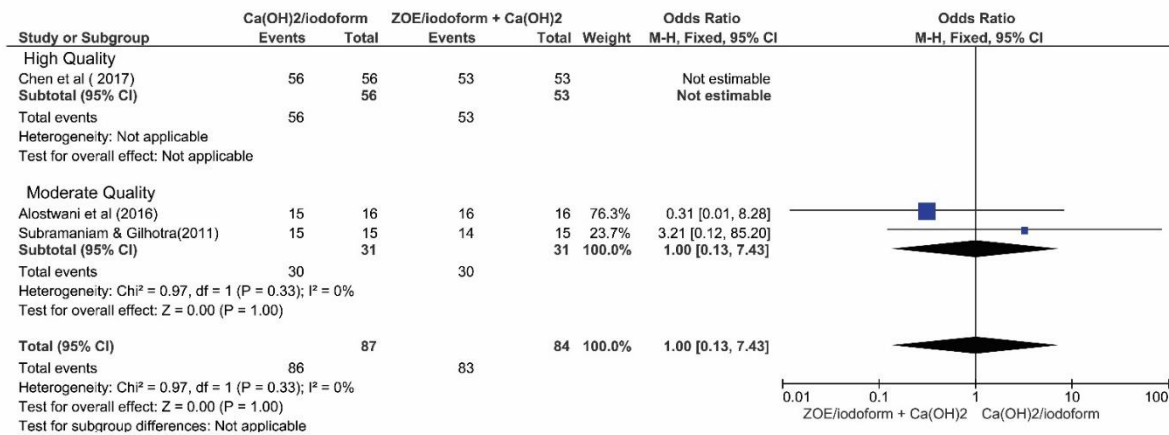

Figure S7. Forest plot for meta-analysis of the clinical success rate of Ca(OH)<sub>2</sub>/iodoform compared to; ZOE and ZOE/iodoform combined with Ca(OH)<sub>2</sub> at 6 months follow up according to study quality level (high and moderate quality)

## Radiographic success rate at 6 months follow up

### (1) ZOE:

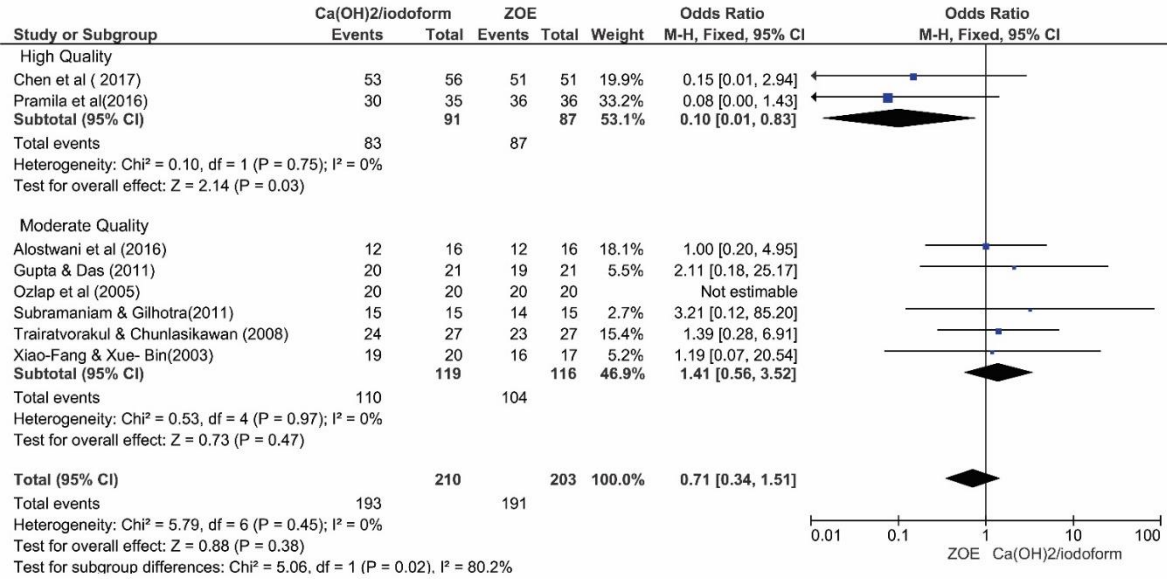

### (2) ZOE /iodoform + Ca(OH)<sub>2</sub>

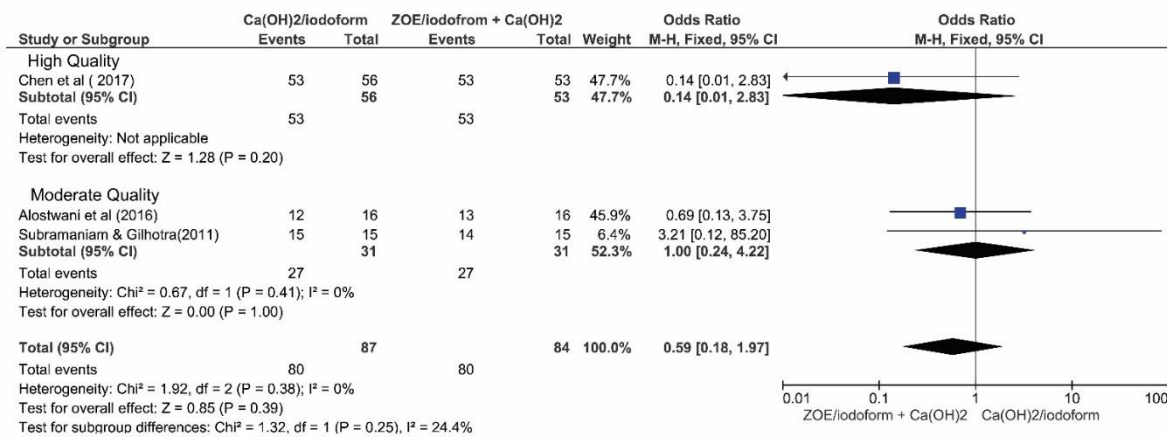

Figure S8. Forest plot for meta-analysis of the radiographic success rate of Ca(OH)<sub>2</sub>/iodoform compared to; ZOE and ZOE/iodoform combined with Ca(OH)<sub>2</sub> at 6 months follow up according to study quality level (high and moderate quality)



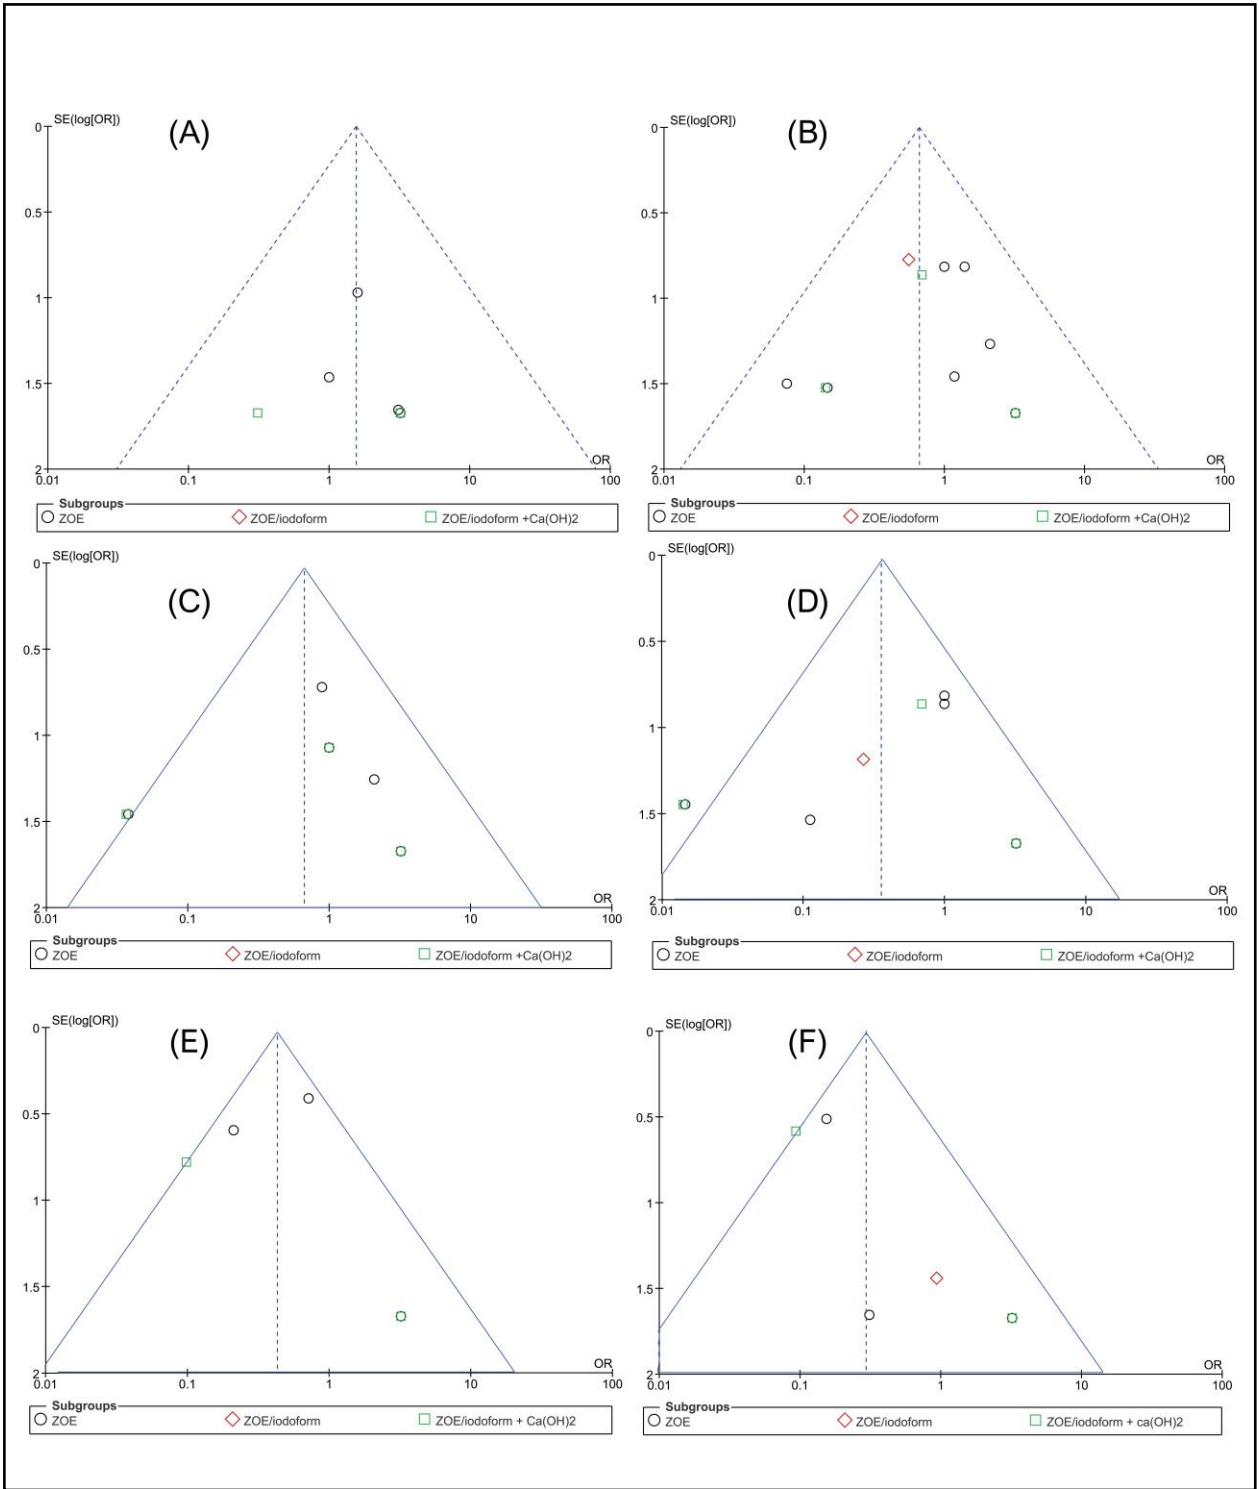

Supplement: CRE2-5-294-s001.pdf [file CRE2-5-294-s001.pdf]
